# Supplementary material
Source: PubMed Central journal article supplement (PMC11514053)
Supplement: NIHMS2028695-supplement-1.pdf [file NIHMS2028695-supplement-1.pdf]

## SUPPLEMENTAL FIGURES

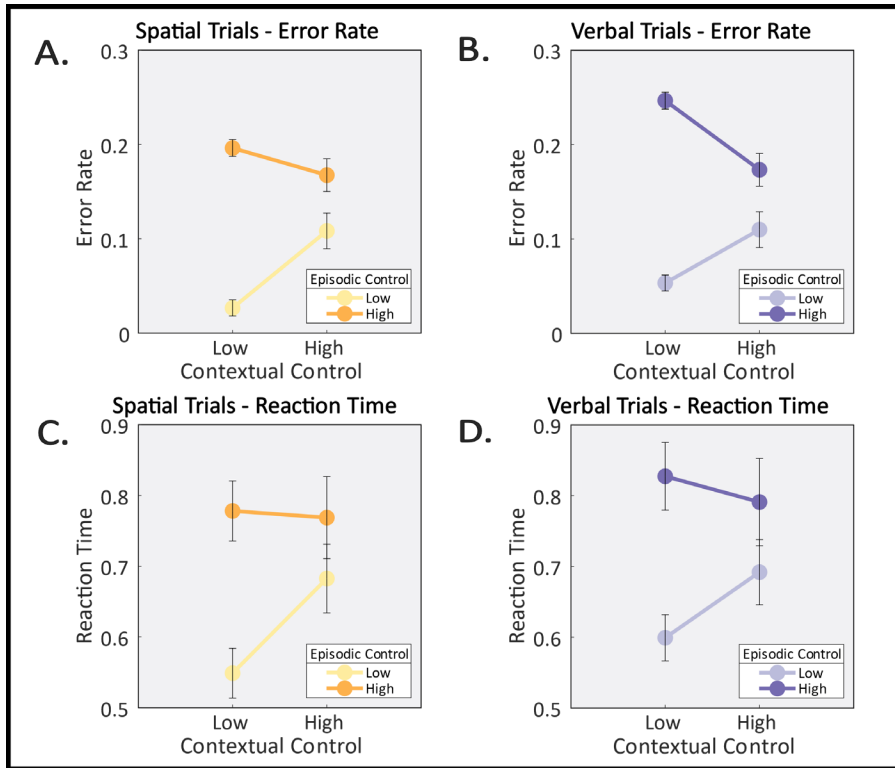

**Fig S1:** Behavioral data on return trials. Error rates for spatial (A) and verbal (B) return trials plotted on the top showing a main effect of episodic control, and an interaction between episodic control and contextual control. Reaction times for spatial (C) and verbal (D) return trials plotted on the bottom showing main effects of episodic control, contextual control, and their interaction, along with a main effect of stimulus domain, and a stimulus domain x contextual control interaction. Spatial trials plotted in orange/yellow, verbal trials plotted in purple/lavender; darker colors denote high episodic control (orange; purple), lighter colors denote low episodic control (yellow; lavender).

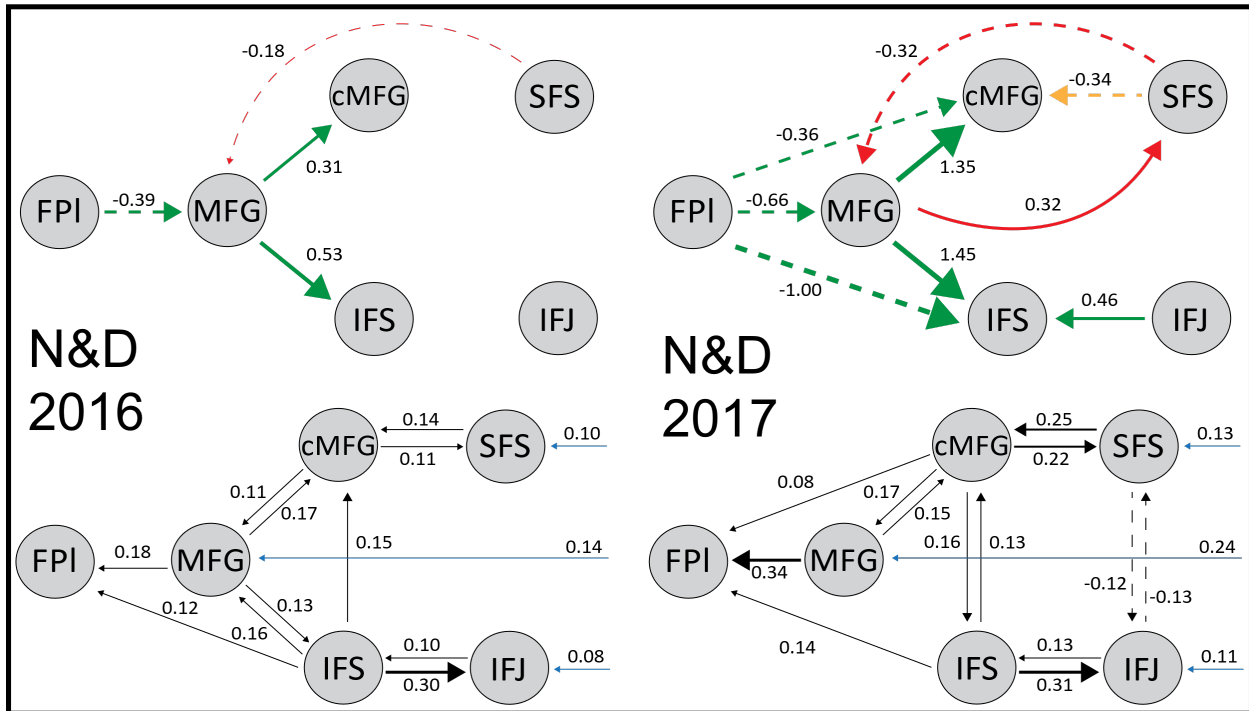

**Fig S2:** Group level PEB showing significant parameter estimates for Nee & D'Esposito 2016 and 2017 after stepwise FDR correction. The top row shows modulations by condition (green = contextual control, red = temporal control, orange = spatial, purple = verbal). The bottom row shows intrinsic connectivity (black) and inputs (blue) to the model.
